# Supplementary material
Source: publisher figshare collection journal article supplement (https://acs.figshare.com/ndownloader/files/3821899)
Supplement: Supplementary file 1 [file 3821899]

# Monitoring the formation of nanowires by line-of-sight quadrupole mass spectrometry: a comprehensive description of the temporal evolution of GaN nanowire ensembles

Sergio Fernández-Garrido,\* Johannes K. Zettler, Lutz Geelhaar, and Oliver Brandt

*Paul-Drude-Institut für Festkörperelektronik, Hausvogteiplatz 5–7, 10117 Berlin, Germany*

E-mail: garrido@pdi-berlin.de

## Supporting Information

### Additional information on the line-of-sight quadrupole mass spectrometer

In order to measure the desorbing Ga flux during growth, a Pfeiffer-Vacuum PrismaPlus quadrupole mass spectrometer equipped with a continuous secondary electron multiplier detector was installed in one of the cell ports of the molecular beam epitaxy system. The angle of the cell port with respect to the substrate normal is  $44^\circ$ . Figure S1 shows a sketch of the line-of-sight quadrupole mass spectrometer (QMS) setup. As shown in the figure, we introduce an aperture between the QMS ionizer and the substrate to restrict the line-of-sight acceptance angle. The distance between the QMS ionizer and the center of the wafer is 596 mm. An aperture with a diameter of 8 mm placed at 296 mm from the ionizer accepts only those Ga atoms desorbed from the inner 1.5 inch of the wafer. As described in Ref. 25, the quadrupole response to the  $\text{Ga}^{69}$  signal was calibrated in GaN-equivalent growth rate units by measuring the  $\text{Ga}^{69}$  signal when

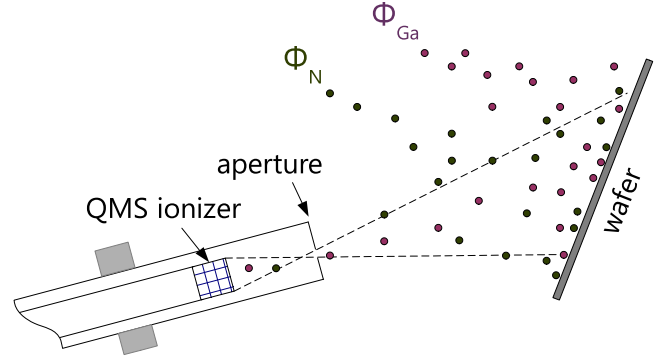

Figure S1: Schematic diagram of the QMS system.

a  $\text{Al}_2\text{O}_3(0001)$  substrate is exposed to different Ga fluxes at a temperature where all impinging Ga atoms are desorbed. As shown in Fig. S2, the  $\text{Ga}^{69}$  signal increases linearly with the impinging Ga flux. The QMS response was thus derived from a linear fit to the experimental data.

### Summary of the samples used in this work and of the constants derived from QMS transients

Table S1 summarizes the growth conditions used for all the samples presented in this work and table S2 the time constants,  $t_1$ ,  $\tau_1$ ,  $t_2$  and  $\tau_2$  derived from fitting eq.1 to the QMS transients.

\*To whom correspondence should be addressed

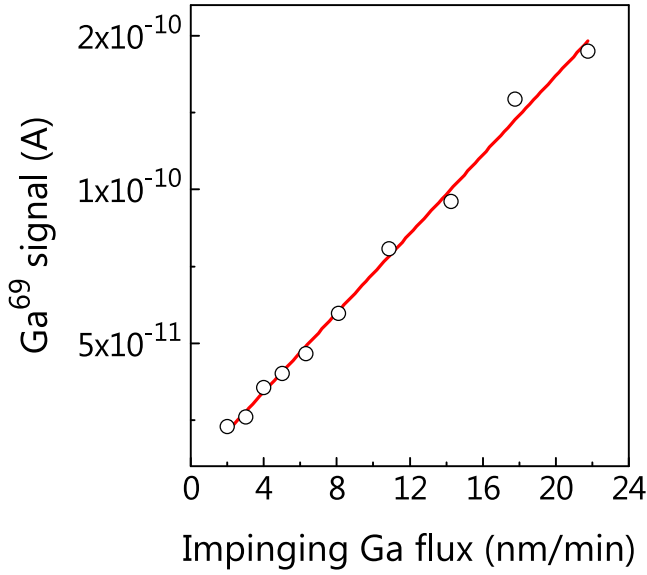

Figure S2:  $\text{Ga}^{69}$  signal measured by QMS as a function of the impinging Ga flux on a  $\text{Al}_2\text{O}_3(0001)$  substrate at  $910^\circ\text{C}$ . The solid red line is a linear fit to the experimental data.

### Temperature dependence of $\tau_2$

As shown in Fig. S3(a), the substrate temperature has a strong impact on the parameter  $\tau_2$ , which determines the time variation in the contribution of collective effects to the total deposition rate. As can be seen in the figure,  $\tau_2$  increases from 12 to 34 min when the temperature is increased from  $775$  to  $835^\circ\text{C}$ . However, in contrast to the delay time for the onset of collective effects  $t_2$ , the temperature dependence of  $\tau_2$  follows an Arrhenius law only with a large error margin. The activation energy derived from the fit is  $(2.0 \pm 0.4)$  eV.

### Impact of the impinging Ga flux on $t_2$ and $\tau_2$

Figure S3(b) presents the variation with the impinging Ga flux of the delay time for the onset of collective effects  $t_2$  and the time constant  $\tau_2$ . For both parameters we observe a clear trend, namely, the higher the Ga flux the shorter the times. As in the case of the parameters related to the nucleation stage,  $t_1$  and  $\tau_1$ , the dependencies of  $t_2$  and  $\tau_2$  on the impinging Ga flux can be described by sim-

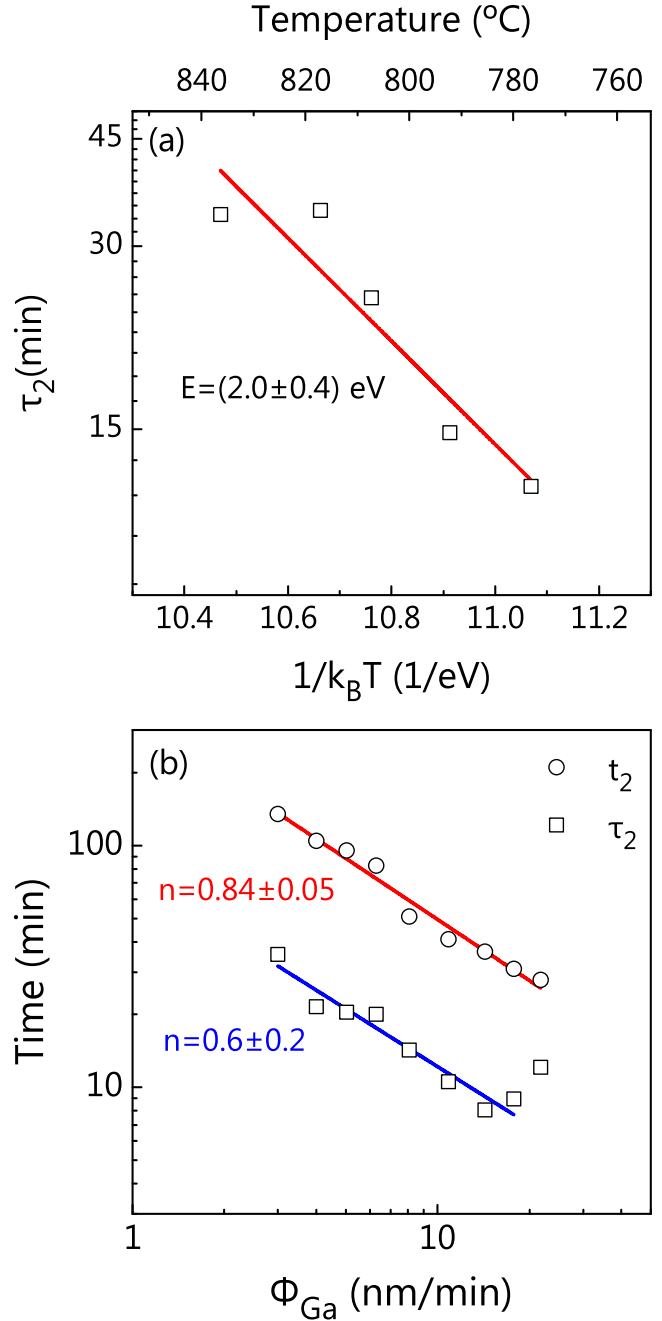

Figure S3: (a) Temperature dependence of the time constant  $\tau_2$  for a series of samples grown with  $\Phi_{\text{Ga}} = (4.9 \pm 0.6)$  nm/min and  $\Phi_{\text{N}} = (10.5 \pm 0.5)$  nm/min. The solid line is a fit of the data by an Arrhenius law. (b) Variation with  $\Phi_{\text{Ga}}$  of the delay time for the onset of collective effects  $t_2$  and the time constant  $\tau_2$  for a series of samples grown at  $805^\circ\text{C}$  with  $\Phi_{\text{N}} = (10.5 \pm 0.5)$  nm/min. The solid lines are fits of the data by eq. S1.

ple power laws defined as:

$$t_2, \tau_2 \propto \frac{1}{\Phi_{\text{Ga}}^n}. \quad (\text{S1})$$

The values of the exponents  $n$  derived from the fits shown in Fig. S3(b) for  $t_2$  and  $\tau_2$  are  $0.84 \pm 0.05$  and  $0.6 \pm 0.2$ , respectively. These results evidence that the time required to form a homogeneous nanowire ensemble depends not only on the substrate temperature but also on the impinging Ga flux.

Table S1: Impinging fluxes  $\Phi_{\text{Ga}}$  and  $\Phi_{\text{N}}$  in nm/min, substrate temperatures  $T$  in  $^{\circ}\text{C}$ , and growth times  $t$  in min for all the samples (#) presented in this work.

| #  | $\Phi_{\text{Ga}}$ | $\Phi_{\text{N}}$ | $T$ | $t$ |
|----|--------------------|-------------------|-----|-----|
| 1  | $4.9 \pm 0.6$      | $10.5 \pm 0.5$    | 805 | 15  |
| 2  | $4.9 \pm 0.6$      | $10.5 \pm 0.5$    | 805 | 30  |
| 3  | $4.9 \pm 0.6$      | $10.5 \pm 0.5$    | 805 | 45  |
| 4  | $4.9 \pm 0.6$      | $10.5 \pm 0.5$    | 805 | 60  |
| 5  | $4.9 \pm 0.6$      | $10.5 \pm 0.5$    | 805 | 85  |
| 6  | $4.9 \pm 0.6$      | $10.5 \pm 0.5$    | 805 | 110 |
| 7  | $4.9 \pm 0.6$      | $10.5 \pm 0.5$    | 805 | 130 |
| 8  | $4.9 \pm 0.6$      | $10.5 \pm 0.5$    | 805 | 180 |
| 9  | $4.9 \pm 0.6$      | $10.5 \pm 0.5$    | 775 | 180 |
| 10 | $4.9 \pm 0.6$      | $10.5 \pm 0.5$    | 790 | 180 |
| 11 | $4.9 \pm 0.6$      | $10.5 \pm 0.5$    | 815 | 180 |
| 12 | $4.9 \pm 0.6$      | $10.5 \pm 0.5$    | 835 | 450 |
| 13 | $3 \pm 0.2$        | $10.5 \pm 0.5$    | 805 | 210 |
| 14 | $4 \pm 0.5$        | $10.5 \pm 0.5$    | 805 | 180 |
| 15 | $6 \pm 1$          | $10.5 \pm 0.5$    | 805 | 180 |
| 16 | $8 \pm 1$          | $10.5 \pm 0.5$    | 805 | 180 |
| 17 | $11 \pm 2$         | $10.5 \pm 0.5$    | 805 | 180 |
| 18 | $14 \pm 2$         | $10.5 \pm 0.5$    | 805 | 180 |
| 19 | $18 \pm 2$         | $10.5 \pm 0.5$    | 805 | 180 |
| 20 | $22 \pm 3$         | $10.5 \pm 0.5$    | 805 | 180 |
| 21 | $4.9 \pm 0.6$      | $4.7 \pm 0.5$     | 815 | 200 |
| 22 | $4.9 \pm 0.6$      | $10.5 \pm 0.5$    | 815 | 200 |

Table S2: Time constants  $t_1$ ,  $\tau_1$ ,  $t_2$ , and  $\tau_2$  in min derived from fitting eq.1 to the corresponding QMS transients.

| #  | $t_1$ | $\tau_1$ | $t_2$ | $\tau_2$ |
|----|-------|----------|-------|----------|
| 8  | 41    | 4.6      | 90    | 23       |
| 9  | 6     | 1.8      | 29    | 12       |
| 10 | 16    | 3        | 48    | 15       |
| 11 | 80    | 7.4      | 132   | 34       |
| 12 | 252   | 10.9     | 325   | 34       |
| 13 | 82    | 10       | 135   | 36       |
| 14 | 53    | 7        | 105   | 22       |
| 15 | 37    | 5.8      | 82    | 20       |
| 16 | 20    | 3.5      | 51    | 14       |
| 17 | 14    | 2.6      | 41    | 11       |
| 18 | 9     | 2.1      | 37    | 8        |
| 19 | 6     | 1.4      | 31    | 9        |
| 20 | 4     | 1.8      | 28    | 12       |
